# Supplementary material for: Development and Validation of a Novel Circadian Rhythm‐Related Signature to Predict the Prognosis of the Patients with Hepatocellular Carcinoma
Source: Hindawi journal article supplement (doi:10.1155/2022/4263261), 2022-01-01
Supplement: f1 [file 4263261.f1.pdf]

| <b>Clinical characteristics of HCC patients</b> | <b>TCGA (total 371)</b> | <b>GSE14520 (total 216)</b> |
|-------------------------------------------------|-------------------------|-----------------------------|
| <b>Age</b>                                      |                         |                             |
| ≤60                                             | 176                     | 178                         |
| > 60                                            | 195                     | 38                          |
| <b>Gender</b>                                   |                         |                             |
| Female                                          | 120                     | 29                          |
| Male                                            | 251                     | 187                         |
| <b>BCLC staging</b>                             |                         |                             |
| A                                               |                         | 145                         |
| B                                               |                         | 22                          |
| C                                               |                         | 29                          |
| Unknown                                         |                         | 20                          |
| <b>TNM staging</b>                              |                         |                             |
| I                                               | 174                     | 90                          |
| II                                              | 85                      | 77                          |
| III                                             | 84                      | 49                          |
| IV                                              | 4                       |                             |
| Unknown                                         | 24                      |                             |
| <b>T</b>                                        |                         |                             |
| T1                                              | 184                     |                             |
| T2                                              | 92                      |                             |
| T3                                              | 79                      |                             |
| T4                                              | 13                      |                             |
| Unknown                                         | 3                       |                             |
| <b>N</b>                                        |                         |                             |
| N0                                              | 253                     |                             |
| N1                                              | 4                       |                             |
| Unknown                                         | 114                     |                             |
| <b>M</b>                                        |                         |                             |
| M0                                              | 269                     |                             |
| M1                                              | 3                       |                             |
| Unknown                                         | 99                      |                             |
| <b>Grade</b>                                    |                         |                             |
| G1                                              | 55                      |                             |
| G2                                              | 178                     |                             |
| G3                                              | 120                     |                             |
| G4                                              | 13                      |                             |
| Unknown                                         | 5                       |                             |
| <b>Cirrhosis</b>                                |                         |                             |
| Yes                                             |                         | 198                         |
| No                                              |                         | 18                          |

|                          |     |     |
|--------------------------|-----|-----|
| <b>Fibrosis</b>          |     |     |
| Yes                      | 139 |     |
| No                       | 76  |     |
| Unknown                  | 156 |     |
| <b>AFP</b>               |     |     |
| ≤300                     | 218 | 118 |
| >300                     | 64  | 98  |
| Unknown                  | 89  |     |
| <b>Vascular invasion</b> |     |     |
| Yes                      | 209 |     |
| No                       | 108 |     |
| Unknown                  | 54  |     |
| <b>Child–Pugh</b>        |     |     |
| A                        | 222 |     |
| B                        | 21  |     |
| C                        | 1   |     |
| Unknown                  | 127 |     |
| <b>Status</b>            |     |     |
| Alive                    | 239 | 132 |
| Dead                     | 132 | 84  |

---

Supplementary Table 1: Clinical features of Hepatocellular carcinoma patients from TCGA database and GSE14520.

### Circadian rhythm-associated gene set from MSigDB

|                                                                |                                                                                                                                                                                                    |
|----------------------------------------------------------------|----------------------------------------------------------------------------------------------------------------------------------------------------------------------------------------------------|
| BIOCARTA_CIRCADIAN_PATHWAY                                     | Circadian Rhythms                                                                                                                                                                                  |
| GOBP_CIRCADIAN_SLEEP_WAKE_CYCLE_NON_REM_SLEEP                  | All sleep stages in the circadian sleep/wake cycle other than REM sleep. These stages are characterized by a slowing of brain waves and other physiological functions.                             |
| GOBP_ENTRAINMENT_OF_CIRCADIAN_CLOCK                            | The synchronization of a circadian rhythm to environmental time cues such as light.                                                                                                                |
| GOBP_NEGATIVE_REGULATION_OF_CIRCADIAN_RHYTHM                   | Any process that stops, prevents, or reduces the frequency, rate or extent of a circadian rhythm behavior.                                                                                         |
| GOBP_REGULATION_OF_CIRCADIAN_RHYTHM                            | Any process that modulates the frequency, rate or extent of a circadian rhythm. A circadian rhythm is a biological process in an organism that recurs with a regularity of approximately 24 hours. |
| GOBP_POSITIVE_REGULATION_OF_CIRCADIAN_RHYTHM                   | Any process that activates or increases the frequency, rate or extent of a circadian rhythm behavior. [GOC:go_curators]                                                                            |
| GOBP_REGULATION_OF_CIRCADIAN_SLEEP_WAKE_CYCLE                  | Any process that modulates the frequency, rate or extent of the circadian sleep/wake cycle.                                                                                                        |
| KEGG_CIRCADIAN_RHYTHM_MAMMAL                                   | Circadian rhythm - mammal                                                                                                                                                                          |
| PID_CIRCADIAN_PATHWAY                                          | Circadian rhythm pathway                                                                                                                                                                           |
| REACTOME_BMAL1_CLOCK_NPAS2_ACTIVATES_CIRCADIAN_GENE_EXPRESSION | BMAL1:CLOCK,NPAS2 activates circadian gene expression                                                                                                                                              |
| REACTOME_CIRCADIAN_CLOCK                                       | Circadian Clock                                                                                                                                                                                    |
| WP_CIRCADIAN_RHYTHM_RELATED_GENES                              | Circadian rhythm related genes                                                                                                                                                                     |
| WP_EXERCISEINDUCED_CIRCADIAN_REGULATION                        | Exercise-induced Circadian Regulation                                                                                                                                                              |

Supplementary Table 2: Circadian rhythm-associated gene set from MSigDB

**Circadian rhythm-related genes**

|         |         |        |          |          |        |          |        |         |           |
|---------|---------|--------|----------|----------|--------|----------|--------|---------|-----------|
| ARNTL2  | PPP1CA  | CSF2   | NKX2-1   | RORA     | CRTC2  | SERPINE1 | CHRM1  | IL6     | PAX4      |
| ATOH7   | PPP1CB  | CSNK1D | NLGN1    | RORB     | CRTC3  | SIRT1    | CIART  | JUN     | PRF1      |
| BHLHE40 | PPP1CC  | CSNK1E | NMU      | RORC     | CUL1   | SKP1     | CLDN4  | JUND    | PRKG2     |
| CRTC1   | RBM4    | DRD2   | NOCT     | SFPQ     | DBP    | SMARCD3  | CRX    | KCND2   | PRMT5     |
| CRY1    | RBM4B   | DRD3   | NONO     | SIAH2    | ELOVL3 | SREBF1   | CST3   | KCNH7   | PROK1     |
| CRY2    | SIK1    | DRD4   | NPS      | SIN3A    | EP300  | TBL1X    | DDC    | KCNMA1  | PROK2     |
| FBXL21P | SOX14   | EZH2   | NPY2R    | SPSB4    | F7     | TBL1XR1  | DDX5   | KDM5A   | PROKR2    |
| FBXL12  | TP53    | FBXW11 | NR1D1    | SRRD     | HE LZ2 | TGS1     | DHX9   | KLF9    | PTEN      |
| FBXL17  | USP2    | FBXW7  | NR1D2    | SUV39H1  | HIF1A  | UBA52    | DRD1   | KMT2A   | RELB      |
| FBXL22  | ADA     | GHRH   | NR1H3    | SUV39H2  | KLF15  | UBB      | DYRK1A | LEP     | SETX      |
| FBXL3   | ADCY1   | GHRHR  | OPN3     | TARDBP   | MED1   | UBC      | EGR1   | LGR4    | SFTPC     |
| FBXL6   | ADORA1  | GHRL   | OPN4     | THRAP3   | MEF2C  | USP46    | EGR3   | MAGED1  | SIX3      |
| FBXL8   | ADORA2A | GSK3B  | PASD1    | TIMELESS | MEF2D  | AANAT    | FAS    | MC3R    | SLC6A4    |
| GNA11   | ADRB1   | HCRTR2 | PIWIL2   | TOP2A    | NAMPT  | ADIPOQ   | GFPT1  | METT L3 | SLC9A3    |
| GNAQ    | ARNTL   | HDAC3  | PPARA    | UBE3A    | NCOA1  | AGRP     | HCRTR1 | MTNR1A  | STAR      |
| ID2     | ATG7    | HNF4A  | PPARG    | USP7     | NCOA2  | AHCY     | HDAC1  | MTTP    | TH        |
| MTA1    | BTRC    | HNRNPD | PPARGC1A | USP9X    | NCOA6  | AHR      | HDAC2  | MYBBP1A | TNFRSF11A |
| NR2F6   | CCAR2   | KDM2A  | PRKAA1   | ZFH X3   | NCOR1  | ARNT     | HEBP1  | NAGLU   | TOP1      |
| OPN5    | CDK1    | KLF10  | PRKAA2   | ATF2     | NFIL3  | ARNT2    | HNF1B  | NGFR    | TPH1      |
| PDE6B   | CHRN B2 | MAGEL2 | PRKCG    | AVP      | NPAS2  | ATF4     | HNRNPU | NMS     | TPH2      |
| PER1    | CIPC    | MAPK10 | PRKDC    | BHLHE41  | NR3C1  | ATF5     | HOMER1 | NOS2    | TYMS      |
| PER2    | CLOCK   | MAPK8  | PROX1    | CARM1    | NRIP1  | BTBD9    | HS3ST2 | NTRK1   | UTS2      |
| PER3    | CREB1   | MAPK9  | PSPC1    | CHD9     | RAI1   | CARTPT   | HTR7   | NTRK3   | UTS2R     |
| PHLPP1  | CREM    | MTNR1B | PTGDS    | CPT1A    | RPS27A | CAVIN3   | ID3    | OGT     |           |
| PML     | CRH     | MTOR   | ROCK2    | CREBBP   | RXRA   | CDK4     | ID4    | OPRL1   |           |

Supplementary Table 3: circadian rhythm-related genes

**Circadian rhythm-related genes differentially expressed genes**

| <b>Gene</b> | <b>Normal-mean</b> | <b>Tumor-Mean</b> | <b>logFC</b> | <b>pValue</b> | <b>FDR</b>  |
|-------------|--------------------|-------------------|--------------|---------------|-------------|
| CREM        | 8.218070784        | 3.680449044       | -1.158917959 | 7.05E-39      | 6.42E-38    |
| ATOH7       | 0.534751895        | 0.197945933       | -1.43376326  | 1.59E-21      | 4.46E-21    |
| RBM4        | 11.87287617        | 1.357816839       | -3.128308679 | 5.52E-25      | 1.86E-24    |
| ARNTL       | 4.594027297        | 1.769389019       | -1.376508154 | 6.89E-33      | 4.14E-32    |
| NCOR1       | 8.798152258        | 3.243113616       | -1.439821001 | 1.27E-65      | 3.12E-63    |
| SKP1        | 40.31971891        | 11.49048253       | -1.811046197 | 9.12E-24      | 2.84E-23    |
| HS3ST2      | 0.26735743         | 0.814819169       | 1.607710149  | 3.80E-30      | 1.99E-29    |
| TH          | 0.274280724        | 0.044136279       | -2.635616326 | 1.21E-62      | 7.43E-61    |
| TOP2A       | 0.560045206        | 6.402659677       | 3.515056138  | 3.00E-63      | 3.69E-61    |
| CHEK1       | 0.465651001        | 1.286271717       | 1.46587445   | 1.36E-46      | 2.79E-45    |
| SIK1        | 4.146311116        | 0.833726733       | -2.314181872 | 3.92E-26      | 1.51E-25    |
| EZH2        | 0.996694396        | 2.625944533       | 1.397613322  | 1.40E-42      | 1.73E-41    |
| NAMPT       | 48.87334826        | 13.96545855       | -1.807185001 | 3.61E-37      | 2.78E-36    |
| UTS2        | 0.050920227        | 0.225822519       | 2.148878609  | 1.59E-10      | 2.71E-10    |
| NOS2        | 0.097227997        | 0.455408416       | 2.227717252  | 9.56E-40      | 9.41E-39    |
| OPRL1       | 0.146823064        | 0.335468503       | 1.192098704  | 2.49E-22      | 7.38E-22    |
| ELOVL3      | 0.035987726        | 0.253239804       | 2.814927321  | 4.50E-15      | 9.97E-15    |
| HLA-DMA     | 7.58297499         | 20.0081208        | 1.399749803  | 1.47E-17      | 3.55E-17    |
| ADORA1      | 0.20516662         | 0.771645651       | 1.911142469  | 0.025379505   | 0.02825049  |
| RBPMS       | 21.53230751        | 4.907062512       | -2.133571379 | 2.51E-46      | 4.75E-45    |
| AGRP        | 0.063154935        | 0.232542199       | 1.880525168  | 2.42E-07      | 3.46E-07    |
| CAVIN3      | 2.411583704        | 4.938063147       | 1.0339644    | 1.24E-10      | 2.11E-10    |
| ARNT2       | 0.204549518        | 0.642143554       | 1.650445718  | 0.041567534   | 0.044653333 |
| ADORA2A     | 2.015854228        | 0.560597653       | -1.846353707 | 3.98E-27      | 1.58E-26    |
| HOMER1      | 0.338093032        | 0.724946552       | 1.100454349  | 5.14E-11      | 8.97E-11    |
| PROK2       | 0.480664824        | 0.03021231        | -3.991822828 | 2.83E-56      | 1.16E-54    |
| TUBB3       | 0.210174971        | 0.092312358       | -1.186995164 | 3.95E-06      | 5.40E-06    |
| SREBF1      | 52.85638195        | 19.02809091       | -1.473946852 | 1.94E-33      | 1.26E-32    |
| SUV39H2     | 0.870675109        | 1.821345391       | 1.064798149  | 1.35E-50      | 3.01E-49    |
| PER1        | 20.01295678        | 7.802629737       | -1.358901986 | 2.88E-43      | 4.17E-42    |
| MAPK10      | 0.454864647        | 0.175118554       | -1.377105358 | 1.28E-44      | 2.26E-43    |
| DRD4        | 0.360871638        | 1.045073904       | 1.534047304  | 1.95E-08      | 2.89E-08    |
| CRX         | 0.080957906        | 0.009197925       | -3.137791673 | 9.62E-25      | 3.15E-24    |
| FBXW7       | 2.510819041        | 1.21818364        | -1.043426421 | 1.08E-50      | 2.66E-49    |
| TYMS        | 2.259355887        | 7.319215249       | 1.695777437  | 1.12E-42      | 1.53E-41    |
| ATR         | 2.985066286        | 1.306585024       | -1.191961959 | 9.26E-22      | 2.62E-21    |
| BHLHE41     | 0.350846437        | 0.977471658       | 1.478215159  | 9.82E-07      | 1.37E-06    |
| NTRK1       | 0.110069473        | 0.044958732       | -1.291741147 | 7.57E-40      | 7.76E-39    |
| CDK1        | 0.444780757        | 3.640814241       | 3.033094855  | 8.84E-63      | 7.25E-61    |
| PSMA4       | 24.60123262        | 12.00736529       | -1.034810979 | 2.99E-25      | 1.03E-24    |

|           |             |             |              |          |          |
|-----------|-------------|-------------|--------------|----------|----------|
| NPAS2     | 4.709008035 | 1.578297618 | -1.577053906 | 2.26E-21 | 6.19E-21 |
| KCNMA1    | 2.926402389 | 0.473986907 | -2.626209044 | 2.76E-52 | 7.55E-51 |
| NGFR      | 5.641944114 | 2.40630436  | -1.229373243 | 1.18E-35 | 8.32E-35 |
| SLC9A3    | 0.082325075 | 1.155006292 | 3.810424978  | 3.66E-15 | 8.26E-15 |
| PRKAA2    | 0.280607854 | 1.505183184 | 2.423311781  | 7.67E-28 | 3.20E-27 |
| MTA1      | 10.18571544 | 3.718747482 | -1.453658626 | 6.50E-26 | 2.42E-25 |
| SUV39H1   | 1.751084589 | 4.304476259 | 1.297588933  | 1.10E-54 | 3.88E-53 |
| SFTPC     | 0.381889654 | 0.024531968 | -3.960420978 | 2.64E-12 | 4.85E-12 |
| ADCY1     | 3.075460197 | 1.283983977 | -1.260175105 | 6.98E-37 | 5.20E-36 |
| NR1H3     | 24.82123226 | 11.38950144 | -1.123870144 | 1.22E-35 | 8.34E-35 |
| SPSB4     | 0.141646922 | 0.03354119  | -2.078293472 | 4.28E-40 | 4.57E-39 |
| NTRK3     | 0.236931855 | 0.020523494 | -3.529123906 | 1.23E-60 | 6.03E-59 |
| IL6       | 1.351032933 | 0.31562181  | -2.097794035 | 1.39E-12 | 2.62E-12 |
| TNFRSF11A | 0.186638975 | 0.405257822 | 1.118589741  | 6.77E-10 | 1.10E-09 |

---

Supplementary Table 4: Differential Circadian rhythm-related genes in cancer and normal tissues.

**Differential genes between low and high risk group**

| <b>Gene</b> | <b>Low-mean</b> | <b>High-mean</b> | <b>logFC</b> | <b>pValue</b> | <b>FDR</b> |
|-------------|-----------------|------------------|--------------|---------------|------------|
| TAT         | 7.17717634      | 4.358036727      | -2.819139613 | 5.75E-31      | 1.81E-28   |
| SDS         | 7.009410329     | 4.297202767      | -2.712207562 | 9.11E-19      | 1.66E-17   |
| PCK1        | 8.081370232     | 5.460036568      | -2.621333664 | 2.05E-28      | 2.48E-26   |
| HPD         | 8.996143868     | 6.433542361      | -2.562601507 | 4.52E-19      | 8.88E-18   |
| SLC10A1     | 7.070036565     | 4.677157321      | -2.392879244 | 6.64E-21      | 1.87E-19   |
| CYP2A6      | 7.07959406      | 4.708411032      | -2.371183028 | 8.38E-14      | 6.01E-13   |
| HSD11B1     | 7.438304691     | 5.412753899      | -2.025550791 | 1.75E-12      | 1.02E-11   |
| CYP3A4      | 6.783322336     | 4.773492115      | -2.009830221 | 5.67E-11      | 2.61E-10   |
| SLC22A1     | 6.149128368     | 4.157739089      | -1.991389279 | 6.39E-13      | 3.99E-12   |
| CPS1        | 8.374410058     | 6.45406246       | -1.920347598 | 8.98E-15      | 7.65E-14   |
| ADH1B       | 8.62981779      | 6.752033682      | -1.877784108 | 9.34E-17      | 1.14E-15   |
| GLYAT       | 5.165214663     | 3.318719692      | -1.846494971 | 2.34E-18      | 3.99E-17   |
| SLC27A5     | 6.61317213      | 4.837543726      | -1.775628404 | 2.33E-22      | 8.77E-21   |
| CFHR4       | 5.905355204     | 4.134992054      | -1.77036315  | 2.18E-19      | 4.51E-18   |
| F9          | 7.469813621     | 5.75259643       | -1.717217191 | 1.08E-16      | 1.31E-15   |
| GYS2        | 4.97927577      | 3.280627591      | -1.698648179 | 2.71E-19      | 5.55E-18   |
| CTH         | 5.583253946     | 3.89856168       | -1.684692266 | 9.54E-23      | 3.98E-21   |
| HPR         | 7.720942656     | 6.110385149      | -1.610557506 | 1.45E-15      | 1.43E-14   |
| AQP9        | 7.473397599     | 5.885703327      | -1.587694272 | 1.59E-10      | 6.83E-10   |
| C6          | 7.181351695     | 5.603004392      | -1.578347303 | 6.04E-19      | 1.15E-17   |
| CYP2C9      | 7.128355635     | 5.551785945      | -1.57656969  | 5.17E-17      | 6.56E-16   |
| ALDOB       | 10.37906632     | 8.806393754      | -1.572672563 | 2.23E-16      | 2.54E-15   |
| HSD17B6     | 8.450771082     | 6.909986377      | -1.540784705 | 4.69E-19      | 9.14E-18   |
| IGFBP1      | 9.368901851     | 7.845570694      | -1.523331157 | 1.59E-14      | 1.30E-13   |
| SERPINC1    | 10.90268529     | 9.392174359      | -1.510510935 | 5.27E-21      | 1.52E-19   |
| HRG         | 9.307254088     | 7.798043744      | -1.509210344 | 5.05E-13      | 3.21E-12   |
| GNMT        | 6.074728479     | 4.5769753        | -1.497753179 | 3.51E-11      | 1.67E-10   |
| BHMT        | 7.248220892     | 5.75275567       | -1.495465222 | 5.45E-11      | 2.52E-10   |
| CYP2C8      | 6.414332082     | 4.931903276      | -1.482428805 | 9.43E-14      | 6.70E-13   |
| INSIG1      | 8.015669474     | 6.558093494      | -1.45757598  | 9.21E-22      | 3.11E-20   |
| SAA1        | 8.262571765     | 6.812757864      | -1.449813901 | 1.15E-05      | 2.45E-05   |
| HP          | 8.988000806     | 7.54729086       | -1.440709946 | 1.56E-17      | 2.16E-16   |
| C8A         | 7.329626821     | 5.963828064      | -1.365798757 | 8.85E-20      | 1.99E-18   |
| AKR7A3      | 5.791679995     | 4.480073506      | -1.311606488 | 4.66E-13      | 2.98E-12   |
| SPP2        | 6.501325287     | 5.191605098      | -1.309720189 | 8.90E-08      | 2.57E-07   |
| HAO2        | 4.966996118     | 3.657433089      | -1.30956303  | 3.51E-09      | 1.25E-08   |
| OTC         | 6.699497645     | 5.401524534      | -1.297973111 | 1.09E-11      | 5.65E-11   |
| PPARGC1A    | 4.087892992     | 2.795680004      | -1.292212988 | 5.66E-23      | 2.50E-21   |
| MT1X        | 6.941387963     | 5.649443575      | -1.291944388 | 1.46E-09      | 5.47E-09   |

|          |             |             |              |          |             |
|----------|-------------|-------------|--------------|----------|-------------|
| SLC38A4  | 7.196792054 | 5.9182128   | -1.278579254 | 3.05E-18 | 5.03E-17    |
| AFM      | 6.410301312 | 5.132914658 | -1.277386654 | 3.83E-10 | 1.56E-09    |
| CFHR5    | 6.653991521 | 5.379207934 | -1.274783587 | 2.60E-08 | 8.13E-08    |
| HAO1     | 7.501144094 | 6.232430468 | -1.268713625 | 1.03E-19 | 2.27E-18    |
| HPX      | 10.050085   | 8.790955809 | -1.259129196 | 1.22E-20 | 3.22E-19    |
| ANGPTL4  | 6.24483693  | 4.987095539 | -1.257741391 | 9.26E-15 | 7.86E-14    |
| FBP1     | 7.374396683 | 6.11987199  | -1.254524693 | 3.01E-16 | 3.35E-15    |
| CYP1A2   | 3.940808965 | 2.687159924 | -1.253649042 | 2.29E-09 | 8.35E-09    |
| UGT1A4   | 6.394339792 | 5.140723011 | -1.253616782 | 4.83E-09 | 1.69E-08    |
| AGXT     | 8.154936549 | 6.902117697 | -1.252818852 | 3.85E-15 | 3.50E-14    |
| APOF     | 5.180776559 | 3.929391263 | -1.251385296 | 1.44E-11 | 7.35E-11    |
| ABCB4    | 5.64912183  | 4.400318603 | -1.248803227 | 1.91E-14 | 1.54E-13    |
| CYP4A11  | 6.633871856 | 5.385329337 | -1.248542519 | 6.05E-14 | 4.45E-13    |
| CDO1     | 7.692117189 | 6.445296664 | -1.246820525 | 3.96E-17 | 5.09E-16    |
| LEPR     | 5.114302054 | 3.869437388 | -1.244864665 | 6.33E-14 | 4.64E-13    |
| CYP4F2   | 6.130451813 | 4.886819463 | -1.24363235  | 2.34E-14 | 1.86E-13    |
| MASP2    | 5.727082971 | 4.484158536 | -1.242924436 | 5.72E-16 | 6.00E-15    |
| RDH16    | 5.958293797 | 4.717718015 | -1.240575782 | 7.94E-11 | 3.58E-10    |
| HGD      | 7.722528965 | 6.483464114 | -1.239064851 | 2.22E-22 | 8.46E-21    |
| PDK4     | 5.147430332 | 3.91761025  | -1.229820083 | 1.33E-15 | 1.31E-14    |
| SLC27A2  | 6.784498679 | 5.554997857 | -1.229500822 | 1.68E-17 | 2.31E-16    |
| BAAT     | 8.322852605 | 7.096461028 | -1.226391578 | 4.45E-18 | 6.98E-17    |
| APCS     | 9.992579429 | 8.771899999 | -1.22067943  | 2.80E-09 | 1.01E-08    |
| FABP4    | 3.843491935 | 2.631435281 | -1.212056655 | 2.09E-15 | 2.01E-14    |
| LECT2    | 6.522745505 | 5.312832047 | -1.209913458 | 2.97E-07 | 7.91E-07    |
| SLC25A15 | 5.87660225  | 4.667245719 | -1.209356531 | 9.19E-19 | 1.67E-17    |
| ANXA10   | 4.329202615 | 3.130229569 | -1.198973046 | 1.12E-15 | 1.12E-14    |
| AZGP1    | 9.086539397 | 7.896592406 | -1.189946991 | 2.48E-18 | 4.19E-17    |
| PON1     | 6.86082231  | 5.673584738 | -1.187237572 | 2.56E-14 | 2.02E-13    |
| NR1I3    | 5.17676949  | 3.995517102 | -1.181252388 | 1.65E-12 | 9.63E-12    |
| ABCA8    | 3.787726354 | 2.617779387 | -1.169946967 | 7.80E-17 | 9.64E-16    |
| SEC14L2  | 5.011464601 | 3.846434315 | -1.165030286 | 4.97E-15 | 4.40E-14    |
| CES2     | 7.740248068 | 6.586306196 | -1.153941871 | 2.03E-13 | 1.38E-12    |
| DCXR     | 8.859635924 | 7.709822116 | -1.149813808 | 1.65E-14 | 1.35E-13    |
| C9       | 5.95360108  | 4.804970295 | -1.148630785 | 6.13E-05 | 0.000118672 |
| CD14     | 8.091795644 | 6.94317393  | -1.148621714 | 1.62E-17 | 2.25E-16    |
| APOC3    | 12.11990244 | 10.97914392 | -1.140758515 | 7.73E-14 | 5.59E-13    |
| CYP2B6   | 4.62696774  | 3.503652331 | -1.123315409 | 5.65E-11 | 2.61E-10    |
| C4BPA    | 9.670784837 | 8.549176197 | -1.12160864  | 2.15E-11 | 1.06E-10    |
| C7       | 4.308528192 | 3.191658179 | -1.116870013 | 6.87E-08 | 2.02E-07    |
| SULT2A1  | 8.125510028 | 7.009040903 | -1.116469125 | 5.95E-08 | 1.76E-07    |
| UGT2B15  | 6.345290003 | 5.230219595 | -1.115070408 | 3.11E-08 | 9.58E-08    |



|          |             |             |              |          |          |
|----------|-------------|-------------|--------------|----------|----------|
| F13B     | 6.441932047 | 5.335205146 | -1.106726901 | 8.60E-14 | 6.16E-13 |
| PLG      | 8.693866332 | 7.589934588 | -1.103931744 | 3.73E-14 | 2.85E-13 |
| GBA3     | 3.987325319 | 2.885253072 | -1.102072247 | 4.88E-11 | 2.27E-10 |
| OGDHL    | 4.998397658 | 3.896920769 | -1.101476889 | 2.53E-13 | 1.69E-12 |
| ARG1     | 8.447255872 | 7.354285715 | -1.092970158 | 5.22E-12 | 2.83E-11 |
| KCNJ8    | 5.032786355 | 3.951831265 | -1.08095509  | 3.36E-17 | 4.39E-16 |
| GLS2     | 3.276151792 | 2.201450226 | -1.074701566 | 1.51E-10 | 6.53E-10 |
| AOX1     | 7.533986359 | 6.464114094 | -1.069872265 | 2.35E-09 | 8.54E-09 |
| GPT      | 5.154037039 | 4.088063719 | -1.06597332  | 2.07E-18 | 3.58E-17 |
| ABCB11   | 3.518966137 | 2.463452888 | -1.055513249 | 1.99E-14 | 1.60E-13 |
| PFKFB1   | 4.082814036 | 3.028609318 | -1.054204718 | 2.98E-14 | 2.31E-13 |
| CCL16    | 6.183297695 | 5.131145509 | -1.052152186 | 9.37E-07 | 2.33E-06 |
| KNG1     | 10.42042785 | 9.369513466 | -1.050914389 | 3.07E-13 | 2.02E-12 |
| GADD45B  | 5.985792076 | 4.935134044 | -1.050658032 | 2.70E-21 | 8.45E-20 |
| ADH1A    | 8.239004434 | 7.189057573 | -1.049946861 | 1.76E-08 | 5.60E-08 |
| TTR      | 10.21537481 | 9.176002662 | -1.039372144 | 9.33E-11 | 4.16E-10 |
| SLCO1B1  | 6.53392709  | 5.499701388 | -1.034225702 | 7.49E-11 | 3.39E-10 |
| C8B      | 7.746879465 | 6.713374543 | -1.033504922 | 2.80E-15 | 2.61E-14 |
| TDO2     | 6.707609456 | 5.677320754 | -1.030288702 | 3.47E-07 | 9.15E-07 |
| IGFBP2   | 7.215826295 | 6.187186104 | -1.02864019  | 1.26E-06 | 3.09E-06 |
| TSC22D3  | 5.100871134 | 4.076703617 | -1.024167517 | 2.71E-18 | 4.53E-17 |
| GADD45G  | 5.292187471 | 4.269614909 | -1.022572562 | 7.74E-17 | 9.60E-16 |
| EHHADH   | 6.713459365 | 5.692493398 | -1.020965968 | 2.23E-15 | 2.13E-14 |
| AKR1D1   | 5.205414936 | 4.187338675 | -1.018076261 | 1.11E-06 | 2.73E-06 |
| ALDH1L1  | 5.397432603 | 4.384627635 | -1.012804968 | 6.27E-08 | 1.85E-07 |
| DNASE1L3 | 3.771218356 | 2.770189532 | -1.001028824 | 4.42E-15 | 3.96E-14 |
| PLK1     | 1.968202899 | 2.970361345 | 1.002158446  | 3.48E-34 | 5.49E-31 |
| MARCKSL1 | 5.619876561 | 6.628641045 | 1.008764484  | 2.69E-16 | 3.02E-15 |
| NEK2     | 2.196241596 | 3.206180484 | 1.009938889  | 1.54E-30 | 3.88E-28 |
| PYCR1    | 2.607253856 | 3.617418619 | 1.010164763  | 6.41E-12 | 3.43E-11 |
| SLC1A5   | 2.621423374 | 3.634463363 | 1.013039989  | 1.61E-16 | 1.89E-15 |
| MCM3     | 4.676302582 | 5.68999691  | 1.013694328  | 9.36E-25 | 5.67E-23 |
| DSG2     | 3.684885387 | 4.707392807 | 1.02250742   | 3.38E-13 | 2.19E-12 |
| PBK      | 2.447284238 | 3.477476742 | 1.030192503  | 7.20E-25 | 4.42E-23 |
| DTL      | 2.760357792 | 3.792852694 | 1.032494902  | 2.40E-25 | 1.61E-23 |
| TACC3    | 2.841117511 | 3.882775171 | 1.04165766   | 5.63E-30 | 1.01E-27 |
| KRT19    | 2.017821085 | 3.059891314 | 1.042070229  | 4.35E-06 | 9.81E-06 |
| NCAPG    | 2.349244978 | 3.393011918 | 1.04376694   | 5.75E-30 | 1.01E-27 |
| MELK     | 2.48997155  | 3.542010213 | 1.052038663  | 8.48E-28 | 8.80E-26 |
| ASF1B    | 2.402744348 | 3.456452154 | 1.053707806  | 2.46E-30 | 5.47E-28 |
| AURKB    | 2.29244832  | 3.347157729 | 1.054709409  | 1.60E-29 | 2.53E-27 |
| BUB1B    | 2.265010191 | 3.320556143 | 1.055545951  | 9.25E-31 | 2.47E-28 |

|          |             |             |             |          |          |
|----------|-------------|-------------|-------------|----------|----------|
| LRRC1    | 2.263630893 | 3.324876939 | 1.061246046 | 1.49E-23 | 7.35E-22 |
| AGR2     | 1.658240607 | 2.719600942 | 1.061360335 | 9.87E-06 | 2.12E-05 |
| MCM6     | 4.05581915  | 5.123381455 | 1.067562304 | 2.14E-28 | 2.52E-26 |
| CLGN     | 2.644766236 | 3.717585808 | 1.072819572 | 2.72E-13 | 1.80E-12 |
| ECT2     | 2.50797978  | 3.5817695   | 1.07378972  | 1.21E-25 | 8.90E-24 |
| S100P    | 3.587211443 | 4.663531004 | 1.076319561 | 3.24E-05 | 6.50E-05 |
| MMP9     | 2.802090193 | 3.880411661 | 1.078321468 | 5.08E-12 | 2.75E-11 |
| ASPM     | 2.842730722 | 3.922278653 | 1.079547931 | 1.53E-25 | 1.09E-23 |
| CDCA8    | 2.430706882 | 3.527009316 | 1.096302435 | 7.55E-34 | 8.81E-31 |
| KIF4A    | 2.308760705 | 3.40550007  | 1.096739365 | 3.98E-30 | 8.26E-28 |
| CKS2     | 5.348296406 | 6.445682475 | 1.097386069 | 2.52E-23 | 1.20E-21 |
| ROBO1    | 4.235273303 | 5.339493783 | 1.104220481 | 8.13E-13 | 4.97E-12 |
| EPS8L3   | 2.644266399 | 3.750508951 | 1.106242552 | 3.21E-14 | 2.47E-13 |
| KIF2C    | 2.180433496 | 3.293512347 | 1.113078851 | 2.98E-34 | 5.49E-31 |
| FOXM1    | 2.434913092 | 3.548395525 | 1.113482433 | 1.59E-27 | 1.60E-25 |
| LMNB1    | 2.786491656 | 3.915125349 | 1.128633692 | 1.68E-27 | 1.65E-25 |
| PRC1     | 2.960891393 | 4.09514297  | 1.134251577 | 1.64E-27 | 1.63E-25 |
| CENPM    | 2.423375295 | 3.559974866 | 1.136599571 | 7.21E-31 | 2.10E-28 |
| NT5DC2   | 2.621914501 | 3.762134099 | 1.140219598 | 1.71E-20 | 4.36E-19 |
| GAL3ST1  | 2.272862867 | 3.423229221 | 1.150366354 | 5.08E-15 | 4.50E-14 |
| SFN      | 3.883254313 | 5.033945038 | 1.150690725 | 5.35E-08 | 1.60E-07 |
| HMGA1    | 4.327884533 | 5.480155219 | 1.152270686 | 1.65E-29 | 2.53E-27 |
| MDK      | 5.270362726 | 6.423948658 | 1.153585931 | 1.10E-10 | 4.86E-10 |
| SOX4     | 2.903978019 | 4.064735273 | 1.160757254 | 1.44E-17 | 2.01E-16 |
| UBD      | 6.714288095 | 7.879801788 | 1.165513692 | 3.28E-10 | 1.35E-09 |
| UPK3A    | 1.933098835 | 3.106704833 | 1.173605998 | 6.88E-15 | 5.94E-14 |
| KIF20A   | 2.376488081 | 3.553215303 | 1.176727222 | 8.07E-31 | 2.24E-28 |
| NUSAP1   | 3.730995155 | 4.911049135 | 1.180053981 | 5.76E-25 | 3.64E-23 |
| PAFAH1B3 | 3.358184638 | 4.542818844 | 1.184634205 | 8.80E-26 | 6.58E-24 |
| VIL1     | 3.225555791 | 4.423603585 | 1.198047794 | 5.95E-12 | 3.19E-11 |
| CCNB2    | 2.631204204 | 3.832135017 | 1.200930813 | 6.08E-31 | 1.83E-28 |
| BAMBI    | 4.302118798 | 5.504158524 | 1.202039726 | 3.26E-16 | 3.60E-15 |
| LAPTM4B  | 5.658808049 | 6.863196934 | 1.204388885 | 3.50E-18 | 5.72E-17 |
| KIFC1    | 2.535601173 | 3.742636499 | 1.207035326 | 6.02E-34 | 8.04E-31 |
| GINS1    | 2.749270202 | 3.964184783 | 1.214914582 | 1.78E-31 | 6.65E-29 |
| MCM2     | 3.250800054 | 4.485768137 | 1.234968083 | 5.06E-28 | 5.56E-26 |
| CDKN3    | 3.098653805 | 4.33937469  | 1.240720885 | 3.58E-26 | 2.83E-24 |
| IGF2BP2  | 3.112044147 | 4.354966345 | 1.242922198 | 2.94E-17 | 3.90E-16 |
| NDRG1    | 5.287002335 | 6.532905655 | 1.245903321 | 3.41E-21 | 1.03E-19 |
| CCL20    | 4.314567325 | 5.571265926 | 1.256698602 | 8.17E-09 | 2.75E-08 |
| RRM2     | 3.594488903 | 4.869471086 | 1.274982183 | 1.24E-25 | 9.02E-24 |
| BIRC5    | 2.631656028 | 3.909987535 | 1.278331506 | 5.19E-31 | 1.73E-28 |

|        |             |             |             |          |          |
|--------|-------------|-------------|-------------|----------|----------|
| SPHK1  | 2.213209065 | 3.495626238 | 1.282417174 | 2.95E-20 | 7.19E-19 |
| ZWINT  | 3.613711868 | 4.931329007 | 1.317617139 | 1.25E-30 | 3.25E-28 |
| PTTG1  | 4.017021764 | 5.372458338 | 1.355436574 | 4.54E-29 | 6.15E-27 |
| CA9    | 1.674178679 | 3.033554889 | 1.359376209 | 1.25E-20 | 3.28E-19 |
| DUSP9  | 2.344854565 | 3.749920143 | 1.405065577 | 8.90E-17 | 1.09E-15 |
| TPX2   | 3.420966296 | 4.833096601 | 1.412130305 | 5.72E-32 | 2.85E-29 |
| G6PD   | 3.162521491 | 4.579357736 | 1.416836245 | 1.40E-25 | 1.00E-23 |
| SPP1   | 5.92289037  | 7.340631904 | 1.417741534 | 3.47E-06 | 7.91E-06 |
| SOX9   | 3.427991275 | 4.854268463 | 1.426277188 | 7.07E-19 | 1.33E-17 |
| CCNB1  | 3.37725186  | 4.851511718 | 1.474259858 | 6.08E-33 | 4.37E-30 |
| SPINK1 | 6.042303268 | 7.524688057 | 1.482384789 | 1.23E-05 | 2.61E-05 |
| CD24   | 4.880487997 | 6.377235995 | 1.496747998 | 5.33E-12 | 2.88E-11 |
| TOP2A  | 3.323142619 | 4.88099359  | 1.557850971 | 1.73E-29 | 2.60E-27 |
| DKK1   | 2.080177484 | 3.654449883 | 1.574272399 | 1.18E-13 | 8.25E-13 |
| MYBL2  | 2.584115958 | 4.227943491 | 1.643827533 | 4.93E-36 | 2.30E-32 |
| CDC20  | 3.00914952  | 4.682372301 | 1.673222781 | 1.36E-33 | 1.27E-30 |
| GPC3   | 6.73961691  | 8.438824148 | 1.699207238 | 4.03E-10 | 1.63E-09 |
| PEG10  | 3.419129192 | 5.245290881 | 1.826161689 | 1.38E-10 | 5.97E-10 |
| AFP    | 3.290265363 | 5.662138236 | 2.371872872 | 1.81E-12 | 1.05E-11 |

---

Supplementary Table 5: Differential genes between the low and high risk group.
